# Supplementary material for: Advances in the Classification and Treatment of Mastocytosis: Current Status and Outlook toward the Future
Source: Oxford University Press journal article supplement (doi:10.1158/0008-5472.can-16-2234), 2017-03-02
Supplement: 00085472can162234-sup-170421_1_supp_3758893_rh9v3n.docx [file 00085472can162234-sup-170421_1_supp_3758893_rh9v3n.docx]

Supplemental Material to:

**Valent et al:**

**Advances in the classification and treatment of mastocytosis:**

**current status and outlook toward the future***

**Supplemental Table S3**

Changes in the WHO Criteria and Classification of Mastocytosis 2016

-------------------------------------------------------------------------------------------------

1. Smoldering systemic mastocytosis (SSM) becomes a full variant of SM

(so far, SSM has been regarded as provisional sub-variant of SM)

2. The term SM-AHN can be used as a synonym or instead of SM-AHNMD

3. The very rare category of extracutaneous mastocytoma is removed*

4. The prognostic impact of the monomorphic infiltrate-type in the skin

in childhood mastocytosis is mentioned in the text of the WHO book

5. The term solitary mastocytoma of skin changes to mastocytoma of skin

6. The ASM subvariant ASM-t (patients in transformation to MCL) is

mentioned in the text of the WHO book 2016

7. The chronic MCL variant is mentioned in the text of the WHO book

------------------------------------------------------------------------------------------------

*The consensus group is of the opinion that this variant may still exist,

but only a very few cases have been described, and all of them showed an

indolent course thereby contrasting with mast cell sarcoma.

Abbreviations: SM, systemic mastocytosis; AHN, associated hematologic

neoplasm; AHNMD, associated hematologic clonal non-mast cell lineage

disease; ASM, aggressive systemic mastocytosis; MCL, mast cell leukemia.
